# Supplementary material for: R-loop proximity proteomics identifies a role of DDX41 in transcription-associated genomic instability
Source: PubMed Central journal article supplement (PMC8677849; doi:10.1038/s41467-021-27530-y), 2021-12-16
Supplement: 41467_2021_27530_MOESM1_ESM.pdf [file 41467_2021_27530_MOESM1_ESM.pdf]

## Supplementary information

### **R-loop proximity proteomics identifies a role of DDX41 in transcription-associated genomic instability**

Thorsten Mosler<sup>1</sup>, Francesca Conte<sup>1</sup>, Gabriel M. C. Longo<sup>1</sup>, Ivan Mikicic<sup>1</sup>, Nastasja Kreim<sup>1</sup>, Martin M. Möckel<sup>1</sup>, Giuseppe Petrosino<sup>1</sup>, Johanna Flach<sup>2</sup>, Joan Barau<sup>1</sup>, Brian Luke<sup>1,3</sup>, Vassilis Roukos<sup>1</sup>, Petra Beli<sup>1,3,\*</sup>

<sup>1</sup>Institute of Molecular Biology (IMB), Mainz, Germany

<sup>2</sup>Department of Hematology and Oncology, Medical Faculty Mannheim of the Heidelberg University, Mannheim, Germany

<sup>3</sup>Institute of Developmental Biology and Neurobiology (IDN), Johannes Gutenberg-Universität, Mainz, Germany

\*Correspondence should be addressed to [p.beli@imb-mainz.de](mailto:p.beli@imb-mainz.de)

This PDF file contains:

Supplementary figure 1: Mapping R-loop-proximal proteome on native chromatin

Supplementary figure 2: DDX41 depletion leads to replication stress and genomic instability

Supplementary figure 3: DDX41 opposes R-loop accumulation

Supplementary figure 4: Genome-wide analysis of DDX41 binding to chromatin and R-loops in DDX41 knockdown U2OS cells

Supplementary figure 5: Genome-wide analysis of DSBs and R-loops in DDX41 knockdown HCT116 cell

Lists of antibodies, siRNAs, oligonucleotides used in this study

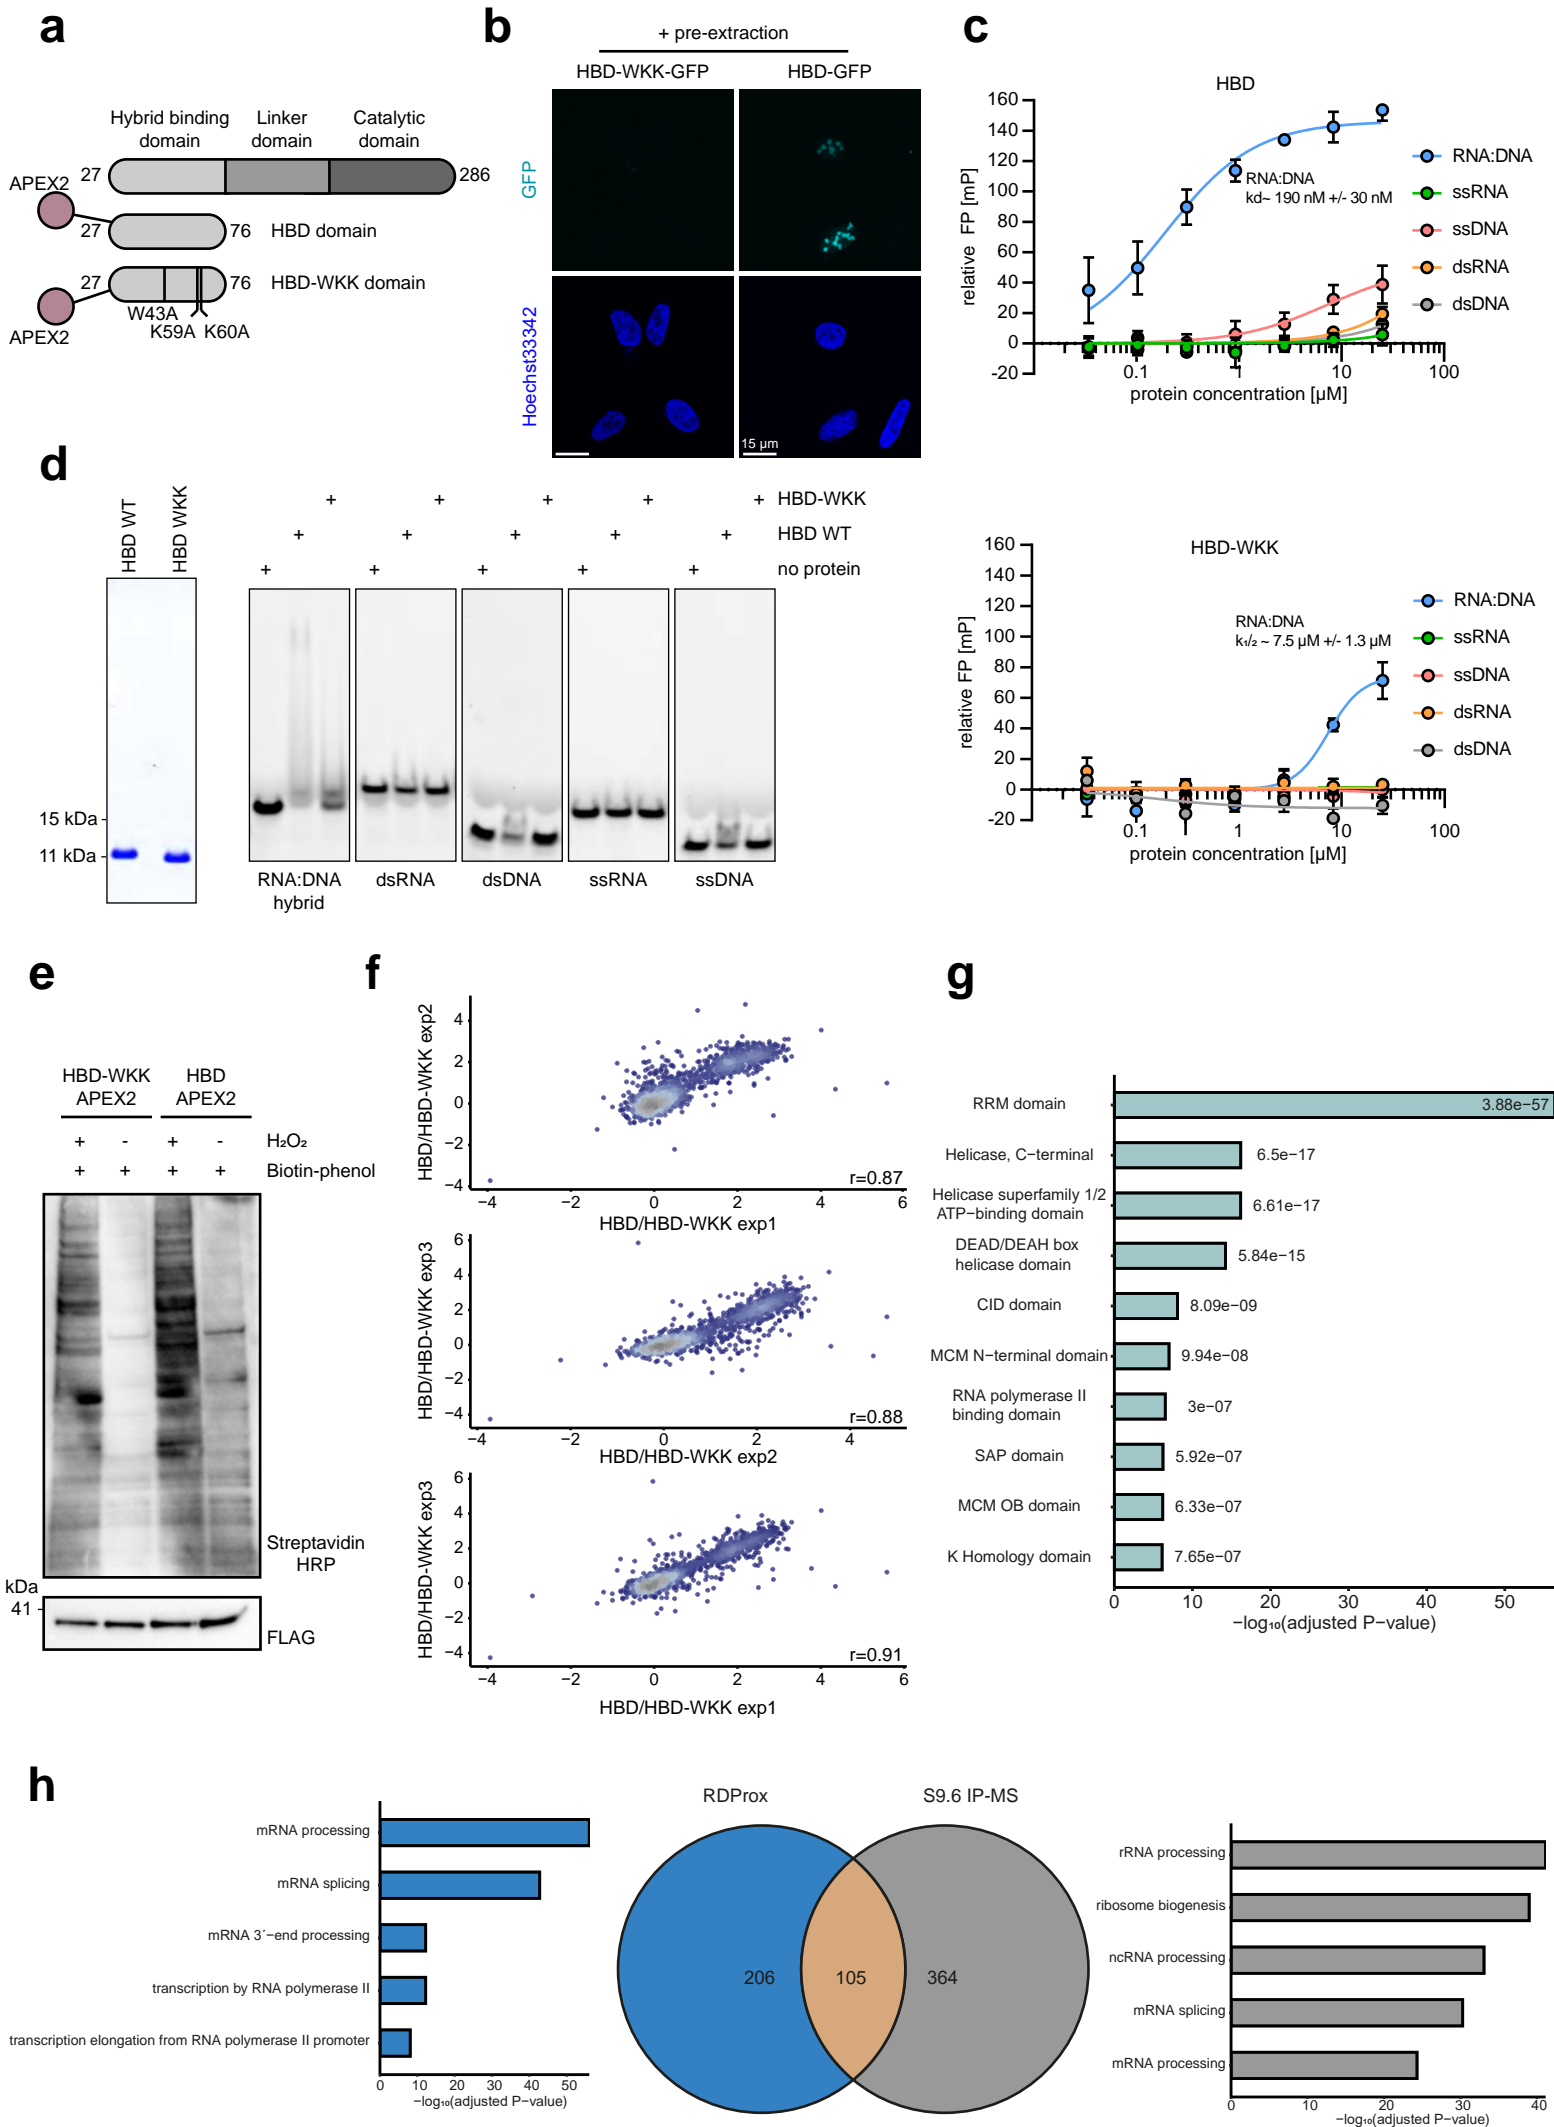

### Supplementary figure 1: Mapping R-loop-proximal proteome on native chromatin

- a. Schematic representation of M27-RNaseH1 domains. The wild type version of hybrid binding domain (HBD) of RNaseH1 was cloned as well as the mutant with indicated WKK point mutations to abrogate the binding function. HBD and HBD-WKK were fused to the ascorbate peroxidase APEX2 on the N-terminus. Numbers indicate amino acid positions.
- b. Immunofluorescence analysis of the retention of GFP-tagged HBD or HBD-WKK on chromatin after pre-extraction with 0.4% NP-40 for 30 min on ice. DNA was counterstained with Hoechst33342 (blue), GFP signal (cyan). Representative images of  $n = 2$  biologically independent experiments. Scale bar represents 15  $\mu\text{m}$ .
- c. Fluorescence polarization (FP) assay of wild type HBD and HBD-WKK mutant. Titrated domains incubated together with indicated 20 nM 6-FAM-conjugated oligonucleotide substrates. Data of  $n = 3$  independent experiments with individually thawed proteins are represented as mean  $\pm$  standard deviation. Colored lines represent either a Michaelis-Menten or a sigmoidal fit. Resulting  $K_D$  or  $k_{1/2}$  values for the association to the RNA-DNA hybrid substrate are displayed. Source data are provided as a Source Data file.
- d. Electro Mobility Shift Assay (EMSA) using 25  $\mu\text{M}$  purified HBD or HBD-WKK mutant and indicated 6-FAM-conjugated oligonucleotides. Protein inputs shown left. Data derived from  $n = 1$  experiment. Source data are provided as a Source Data file.
- e. Representative western blot of biotinylated proteins in U2OS whole cell extracts after HBD-APEX2 or HBD-WKK-APEX2 proximity labeling from  $n = 2$  biologically individual experiments. Source data are provided as a Source Data file.
- f. Multi-scatter plots indicating the correlation between the  $n = 3$  biologically independent RDProx SILAC experiments in HEK293T cells. Pearson correlation is indicated below each plot. Coloring indicates the density of the population (blue=less dense, grey= high density).
- g. PFAM InterPro Domain enrichment analysis using EnrichR. Adjusted p-values were derived using two-sided Fisher's exact test with Bonferroni correction.
- h. GO Biological Process analysis of protein groups identified in S9.6 immunoprecipitation-based mass spectrometry screen (Cristini et al., 2018) and RDProx Tier 1. The 5 GO-BP terms with the lowest adjusted p-value (two-sided Fisher's exact test, Bonferroni correction) are shown.

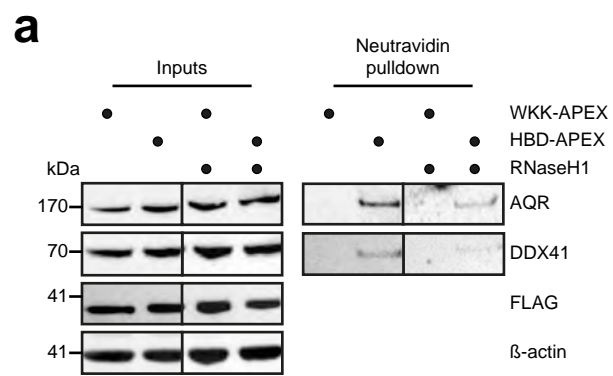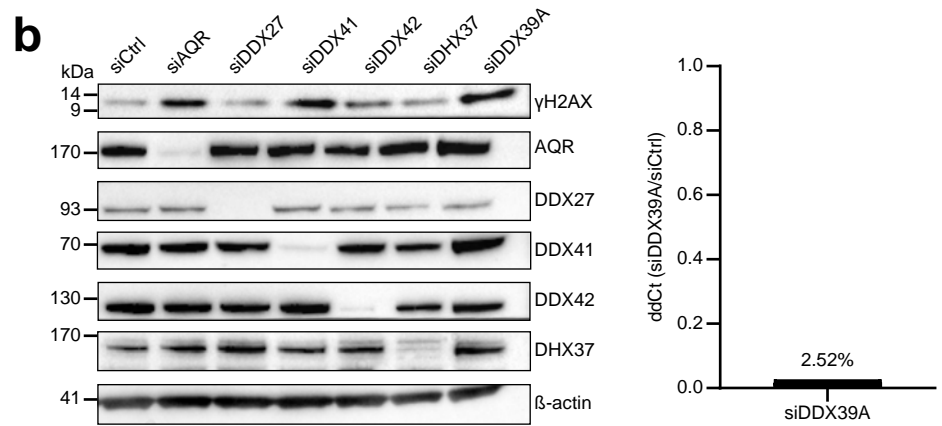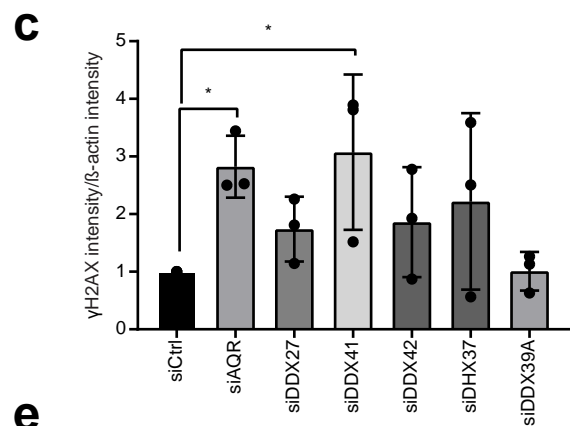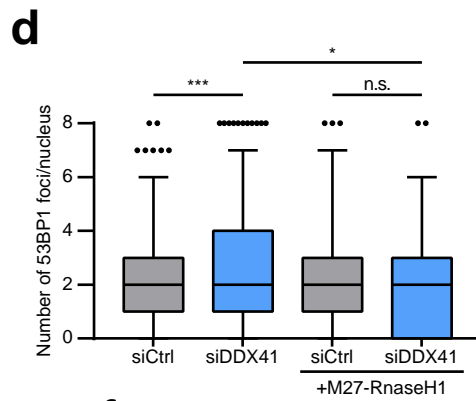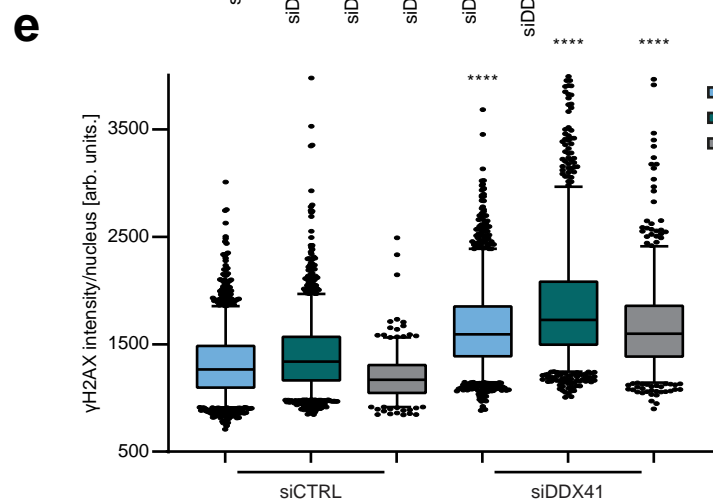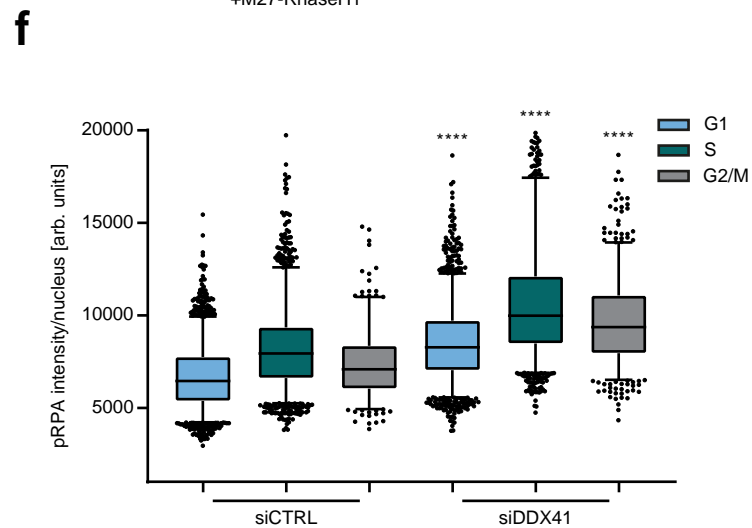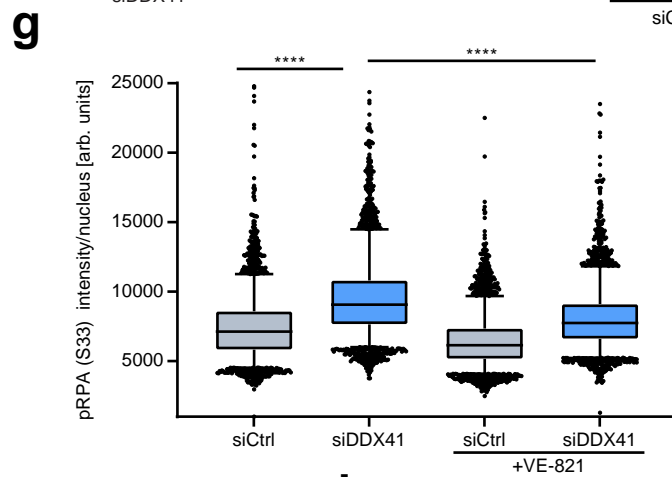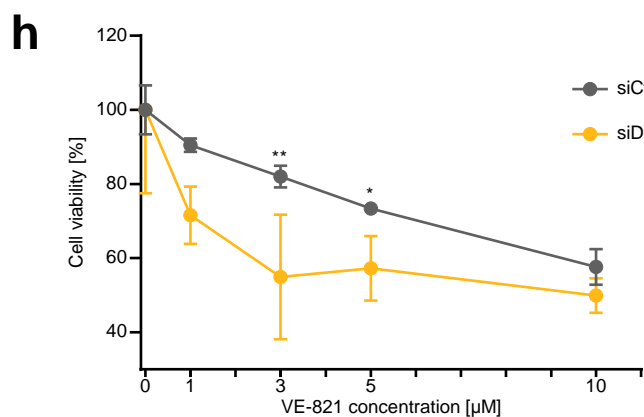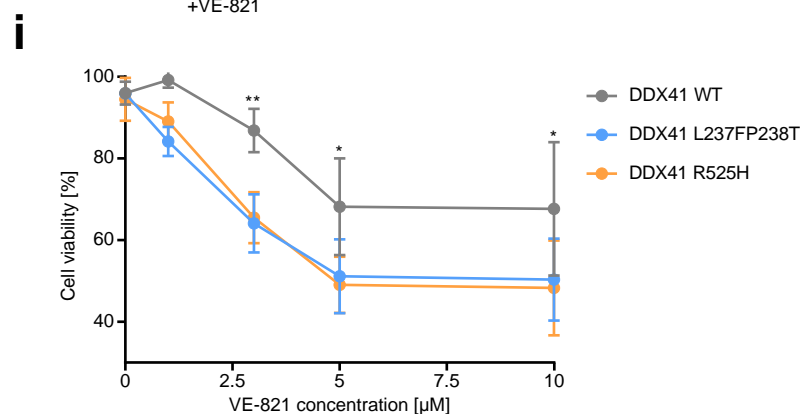

## Supplementary figure 2: DDX41 depletion leads to replication stress and genomic instability

- a. RDPprox-Western blot analysis AQR and DDX41 in U2OS cells +/- expression of M27-RNaseH1. Data from n = 1 experiment. Source data are provided as a Source Data file.
- b. Representative Western blot of  $\gamma$ H2AX in U2OS cells after indicated knockdown. Bar plot shows qPCR after DDX39A knockdown. Mean value of the ddCt values between siDDX39A and a control knockdown against GAPDH control of n = 1 biologically individual experiment is plotted. Data are represented as the mean +/- standard deviation of 2 technical replicates. Source data are provided as a Source Data file.
- c. Quantification of the ratio between  $\gamma$ H2AX intensity and  $\beta$ -actin. Data of n = 3 biologically independent experiments is represented as the mean +/- standard deviation. P-values (p = 0.0297, p = 0.2627, p = 0.0177, p = 0.2627, p = 0.1876, p = 0.8433) derived using Kruskal-Wallis test with Benjamini-Hochberg correction for multiple comparisons. Source data are provided as a Source Data file.
- d. Immunofluorescence analysis of 53BP1 foci 48 h after indicated knockdowns in U2OS cells +/- expression of M27-RNaseH1-GFP. Boxplot limits indicate the 25<sup>th</sup> to 75<sup>th</sup> percentile, whiskers the 5<sup>th</sup> -95<sup>th</sup> percentile and the center line the median. Dots represent outliers. Three outlier data points above 8 foci/cell are cut off. Representative data of n = 2 biologically independent experiments. P-values (p = 0.008, p = 0.0455, p = 0.3005) derived from n > 170 cells using one-way-ANOVA with Tukey correction for multiple comparisons. Source data are provided as a Source Data file.
- e. Immunofluorescence analysis of  $\gamma$ H2AX after 48 h knockdown with the indicated siRNAs in different cell cycle stages: G1 (blue), S (green), G2/M (grey). Centerline of box plots represents the median, whiskers indicate the 10<sup>th</sup>-90<sup>th</sup> percentile and box limits the 25<sup>th</sup>-75<sup>th</sup> percentile. Dots represent outliers. Representative data of n = 2 biologically independent experiments. P-values (p < 0.0001, p < 0.0001, p < 0.0001) derived by one-way-ANOVA with Tukey correction for multiple comparisons. Source data are provided as a Source Data file.
- f. Same as in S2e, but cells were stained for pRPA (Ser33). P-values (p < 0.0001, p < 0.0001, p < 0.0001) derived by one-way-ANOVA with Tukey correction for multiple comparisons. Source data are provided as a Source Data file.
- g. Immunofluorescence analysis of pRPA (Ser33) in U2OS cells after indicated knockdowns for 48 h and 6 h treatment with DMSO or 10  $\mu$ M VE-821. Boxplot limits indicate the 25<sup>th</sup> to 75<sup>th</sup> percentile, whiskers the 5<sup>th</sup> -95<sup>th</sup> percentile and the center line the median. Outliers are represented by dots. P-values (p < 0.0001, p < 0.0001) derived by one-way-ANOVA with Tukey correction for multiple comparisons. N = 2. Source data are provided as a Source Data file.
- h. Cell titer blue assay in U2OS cells after indicated knockdowns. Data from n = 3 biologically independent experiments is represented as mean +/- standard deviation. P-values (p = 0.033, p = 0.0038) derived using two-way ANOVA with Tukey correction for multiple comparisons. Source data are provided as a Source Data file.
- i. Cell titer blue assay in OCI-AML3 cells after expression of DDX41 WT, R525H or L237FP238T mutants. Data from n = 3 biologically independent experiments is represented as mean +/- standard deviation. P-values (p = 0.0044, p = 0.0078, p = 0.0374, p = 0.0179, p = 0.338, p = 0.0162) derived using two-way ANOVA with Tukey correction for multiple comparisons. Source data are provided as a Source Data file.

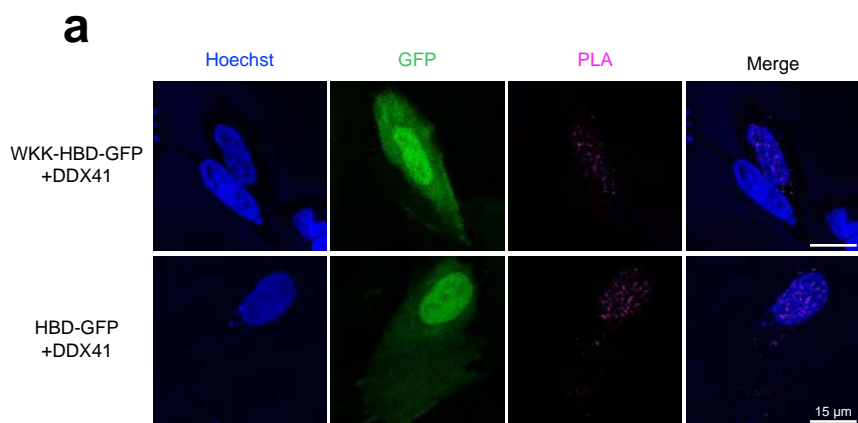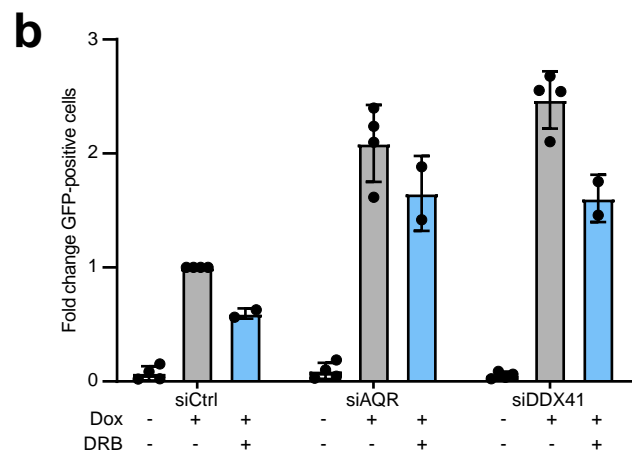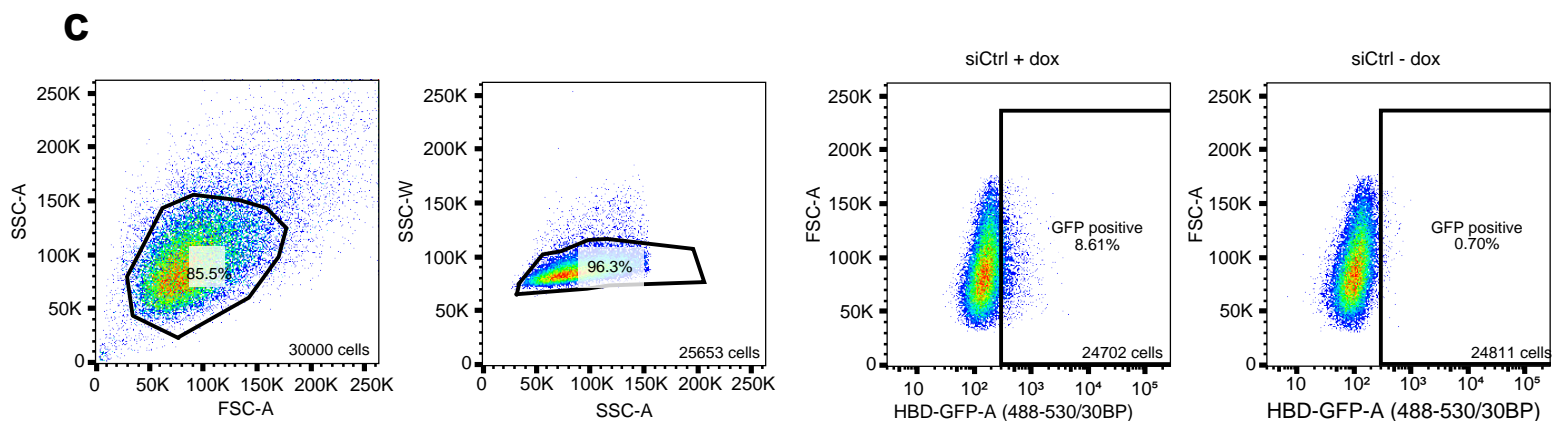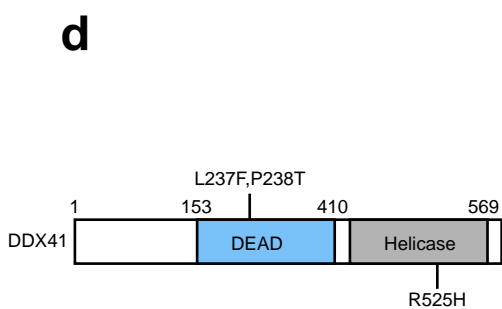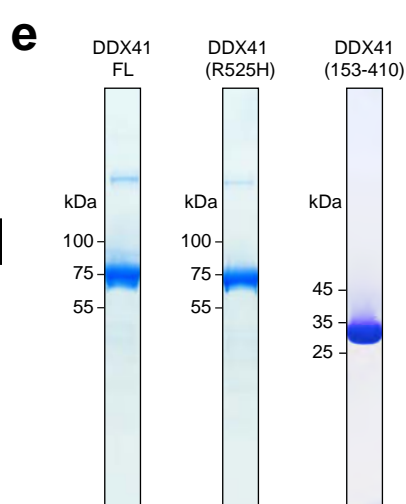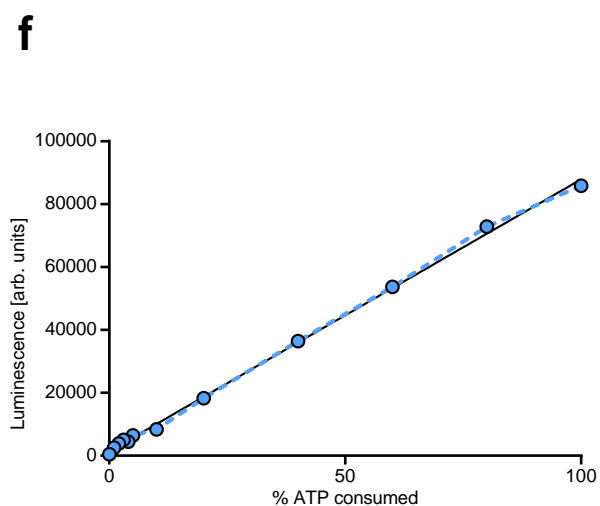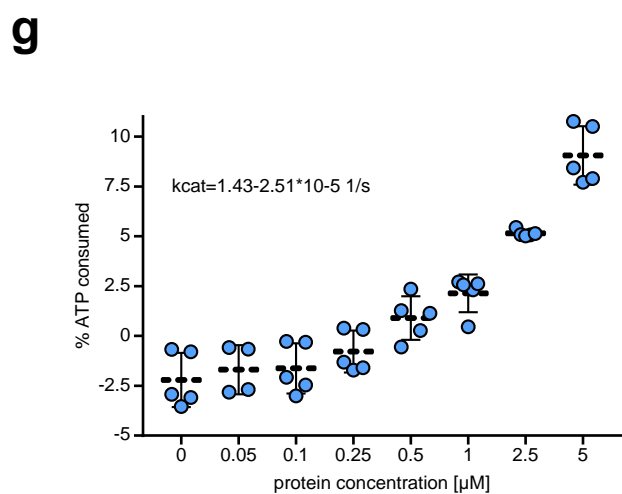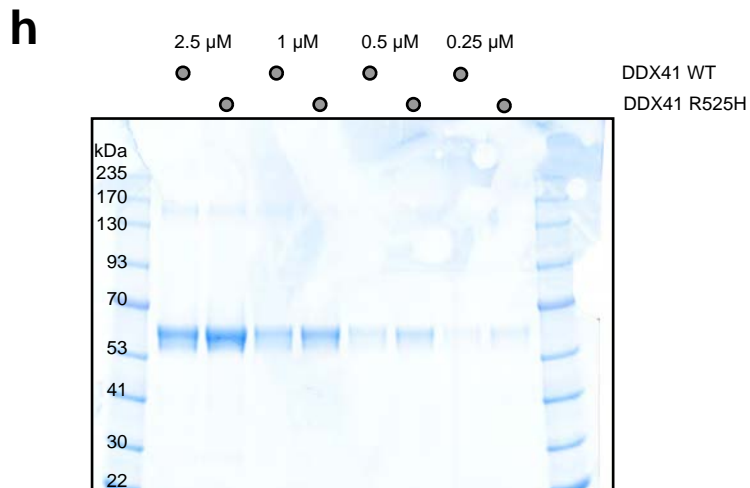

### Supplementary figure 3: DDX41 opposes R-loop accumulation

- a. Representative images of Proximity Ligation assay (PLA) between endogenous DDX41 and exogenously expressed HBD-GFP or HBD-WKK-GFP. Data derived from n = 1 individual experiment. Scale bar represents 15  $\mu$ m.
- b. Bar plot displays the quantification of the HBD retention assay in U2OS cells analyzed by flow cytometry 48 after indicated knockdowns +/- 2 h treatment with DMSO or 10  $\mu$ M DRB. Data are represented as mean +/- standard deviation. Dots represent individual measurements. Experiments were performed: n = 4 for knockdowns, n = 2 for DRB controls. Source data are provided as a Source Data file.
- c. Representative flow cytometry gating strategy used in Supplementary figure 3b. Data was derived from n = 4 biologically independent experiments.
- d. Schematic representation of full length DDX41 domain organization. Pathogenic AML/MDS variants are indicated. Numbers represent corresponding amino acid positions.
- e. Coomassie-stained gel of 6his-tagged DDX41 full length, R525H and 153-410 mutant after expression and purification from SF9 insect cells.
- f. Standard curve for the interpolation of values obtained from the ADP-Glo assay. ATP and ADP were mixed in various ratios and further processed together with ADP-Glo samples. Activity of the luciferase was increased with increased ADP concentration in a linear manner. Source data are provided as a Source Data file.
- g. ADP-Glo assay measuring ATP hydrolysis of full length DDX41 in n = 5 independent experiments using individually thawed proteins. Titrated DDX41 was incubated together with 100 nM RNA-DNA hybrid substrate with an ssDNA overhang and 5  $\mu$ M ATP for 60 minutes at 37°C. ATP to ADP conversion was measured by luciferase activity. Results are displayed as percentage of consumed ATP compared to total ATP, based on an interpolation against a standard curve. Dots indicate individual measurements. Data are represented as mean +/- standard deviation. Source data are provided as a Source Data file.
- h. Coomassie-stained gel of 6his-tagged DDX41 full length and R525H mutant protein inputs used for the RNA-DNA hybrid unwinding assay in Figure 3f. Representative data of n = 3 experiments with individually thawed proteins.

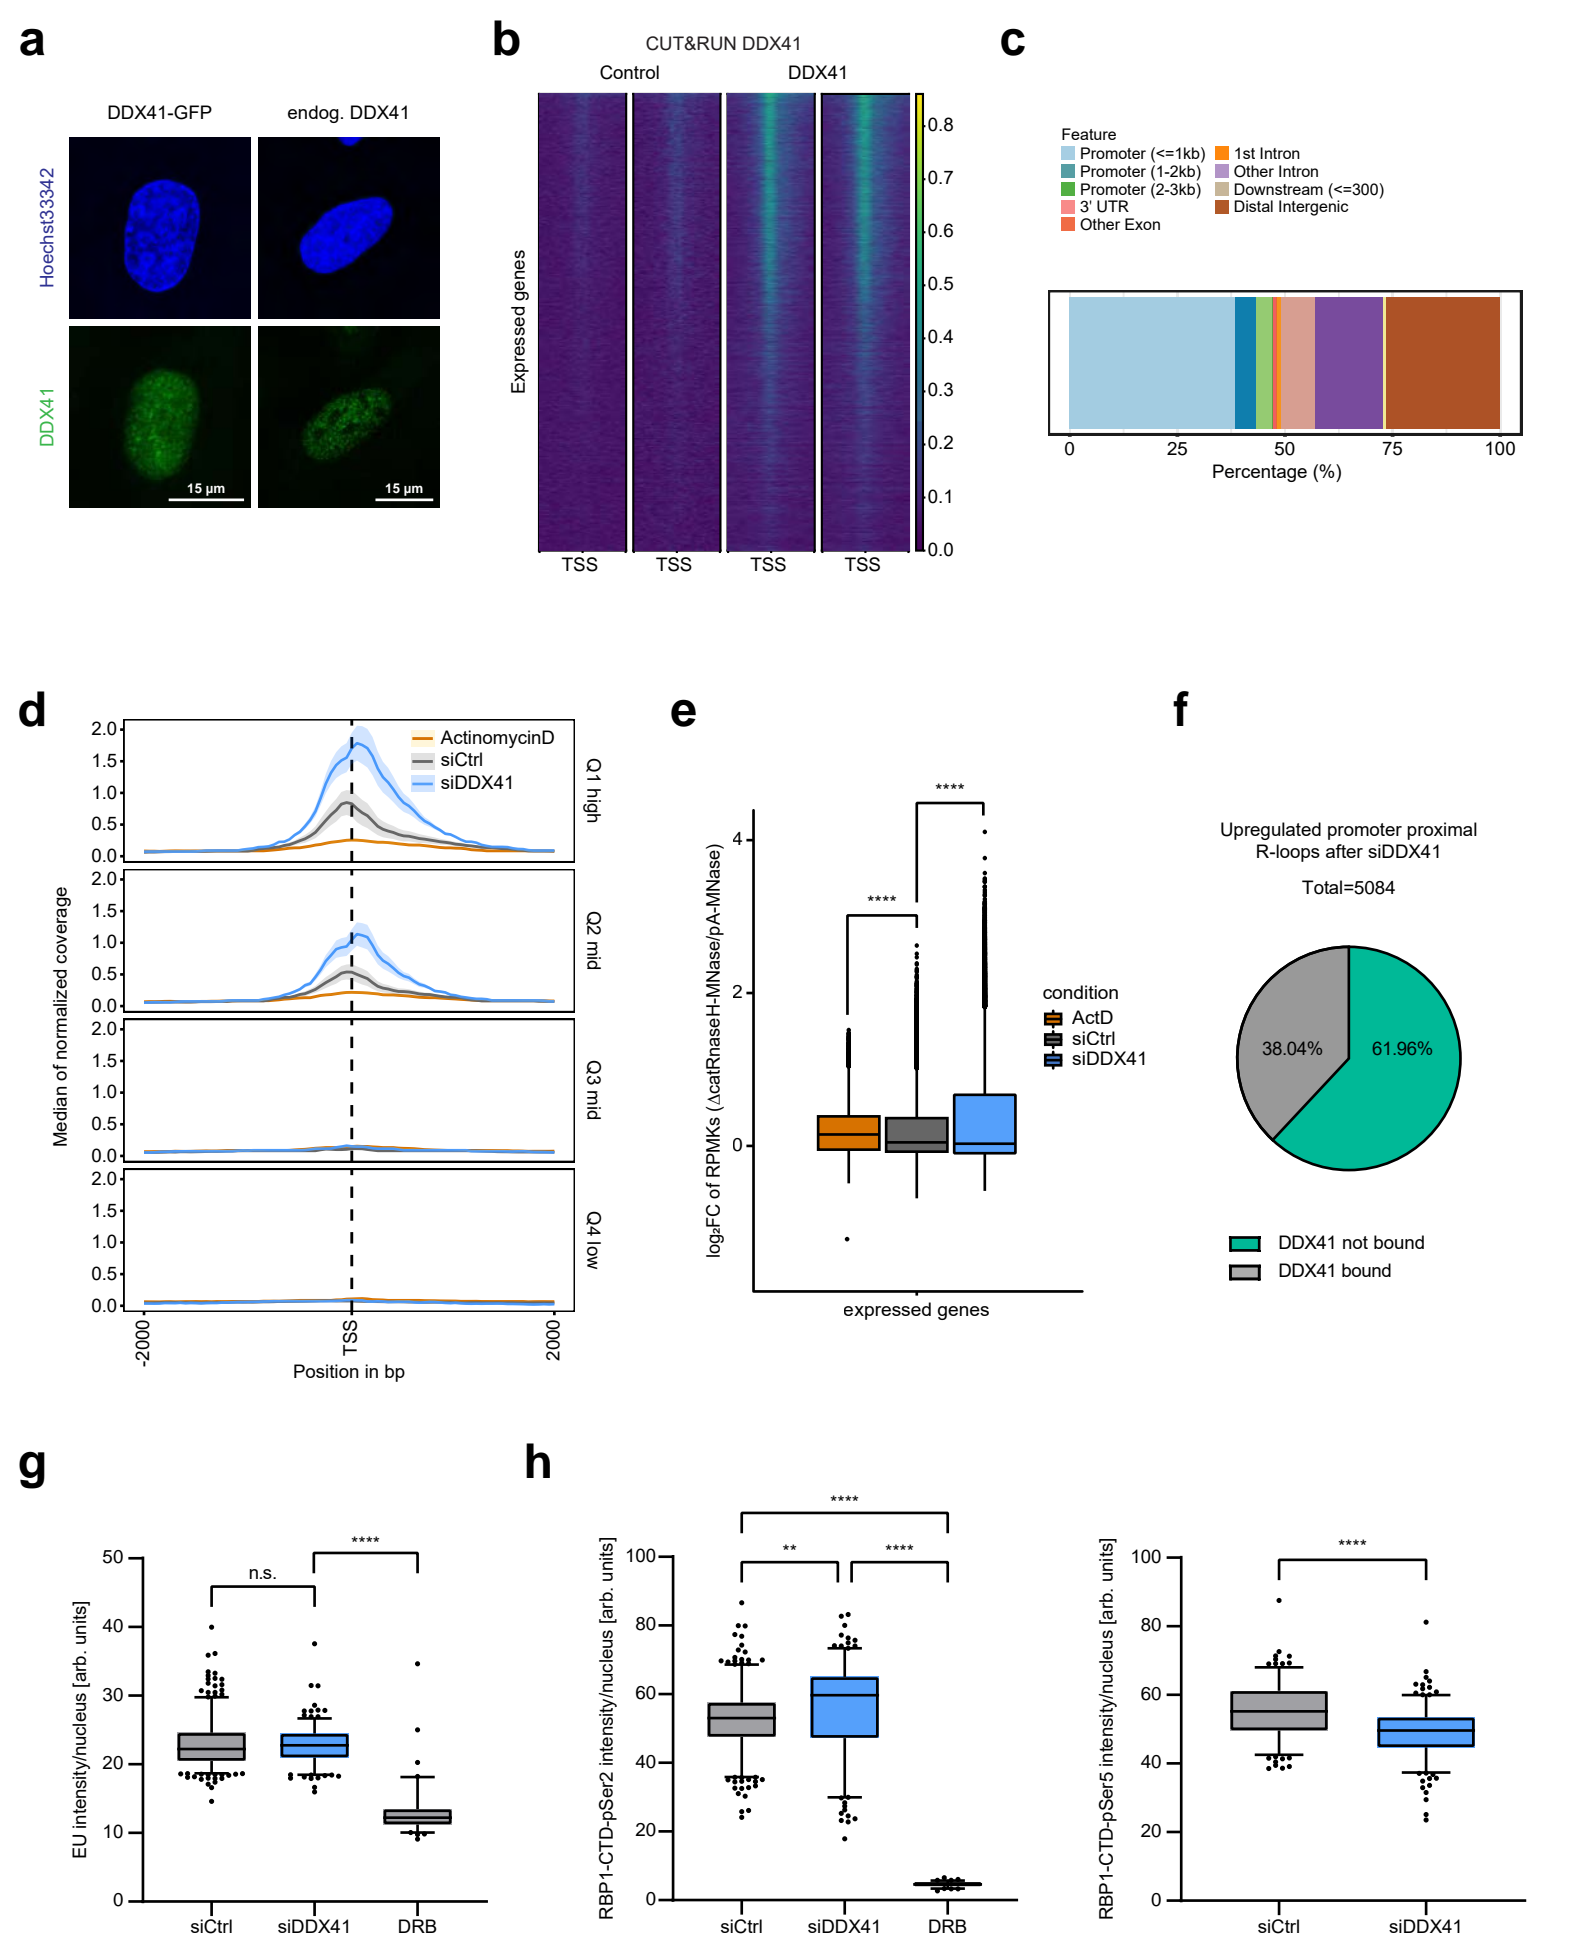



#### **Supplementary figure 4: Genome-wide analysis of DDX41 binding to chromatin and R-loops in DDX41 knockdown U2OS cells**

- a. Representative immunofluorescence images from  $n = 1$  experiment of the subcellular localization of doxycycline-inducible GFP-tagged DDX41 and endogenous (endog.) DDX41. Scale bars represent 15  $\mu\text{m}$ .
- b. Heat maps of CUT&RUN signal from -2kilo bases (kb)/+2kb around the transcription start site (TSS) of expressed genes sorted by expression level.
- c. Bar plot displaying the feature distribution of all peaks called by MACS2 in the MapR experiment in  $n = 3$  biologically independent experiments from U2OS cells after 48 h knockdown with control siRNA. Consensus peaks were constructed using the intersection of peaks in the replicates per group (Control, DDX41 knockdown) and the union of the resulting peaks were used as a consensus peak set. Proportion of the individual feature is represented in the indicated colors.
- d. MapR in U2OS cells performed in  $n = 3$  biologically independent experiments after 48 h knockdown with control siRNA (grey), DDX41 siRNA (blue) or treatment with 4  $\mu\text{M}$  Actinomycin D for 6 hours (orange). Metagene profiles of MapR signal ranging from -2kilo bases (kb)/+2kb around the transcription start site (TSS) of all expressed genes based on RNA-sequencing analysis of U2OS cells, divided in 4 quantiles. Shadows indicate the standard error of the median between replicates.
- e. The  $\log_2$  fold change (FC) of the reads per kilo base per million mapped reads (RPMK) of MapR signal between the  $\Delta\text{catRNaseH-MNase}$  and the untargeted pA-MNase obtained +/-1kb around the transcription start site (TSS) of all expressed genes based on RNA-sequencing. Mean RPMKs between  $n = 3$  biologically independent experiments are shown. Whiskers represent the 5<sup>th</sup>-95<sup>th</sup> percentile, limits the 25<sup>th</sup>-75<sup>th</sup> percentile, the center line the median and individual dots depict outliers. P-values ( $p < 0.0001$ ,  $p < 0.0001$ ) were derived using two-sided paired Welch's t-test.
- f. Pie chart shows the proportion of R-loop gains in promoter regions that were also found to associate with GFP-DDX41 in CUT&RUN experiments in U2OS cells.
- g. Confocal microscopy analysis of EU intensity in U2OS cells after transfection for 48 h with control or DDX41 siRNA or DRB treatment for 3 h. Center line within the box represents the median, whiskers the 5<sup>th</sup>-95<sup>th</sup> percentile, limits the 25<sup>th</sup>-75<sup>th</sup> percentile and dots indicate outliers. At least 200 cells per condition were measured across  $n = 1$  experiment. P-values ( $p = 0.761$ ,  $p < 0.0001$ ) derived using one-Way-ANOVA with Tukey correction for multiple comparisons. Source data are provided as a Source Data file.
- h. Confocal microscopy analysis of RBP1-CTD pSer2 or pSer5 intensity in U2OS cells after transfection for 48 h with control or DDX41 siRNA or DRB treatment for 3 h. Center line within the box represents the median, whiskers the 5<sup>th</sup>-95<sup>th</sup> percentile, limits the 25<sup>th</sup>-75<sup>th</sup> percentile and dots indicate outliers. At least 200 cells per condition were measured across  $n = 1$  experiment. P-values ( $p = 0.0095$ ,  $p < 0.0001$ ,  $p < 0.0001$ ) were calculated using one-way-ANOVA with Tukey correction for multiple comparisons. Ser5: p-value  $< 0.0001$  derived using two-sided student's t-test. Source data are provided as a Source Data file.

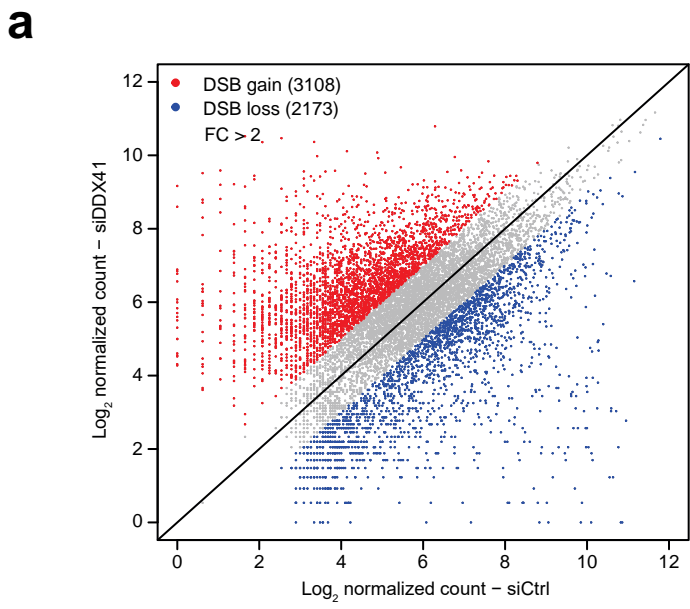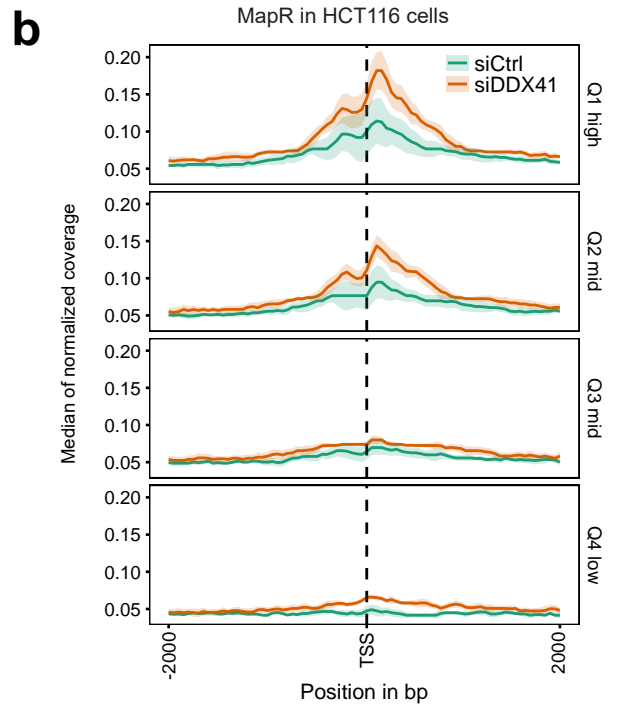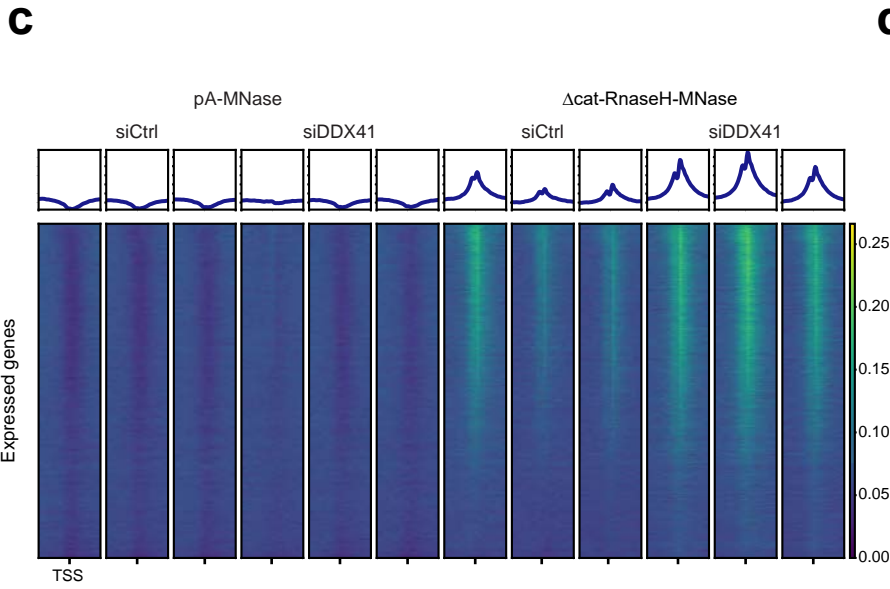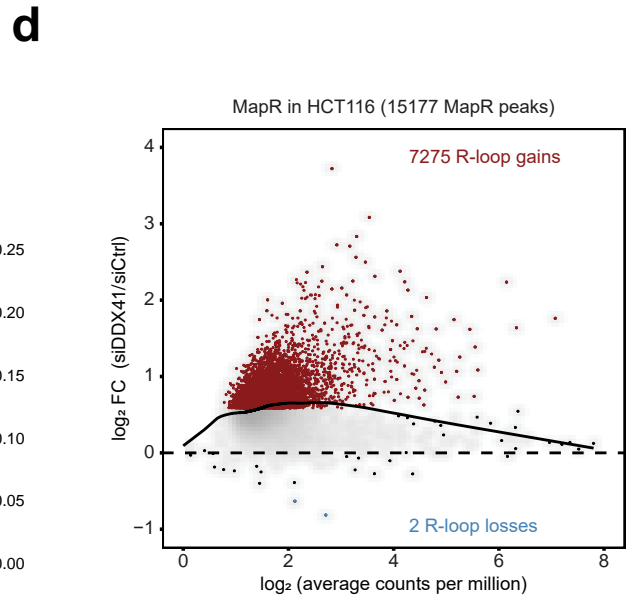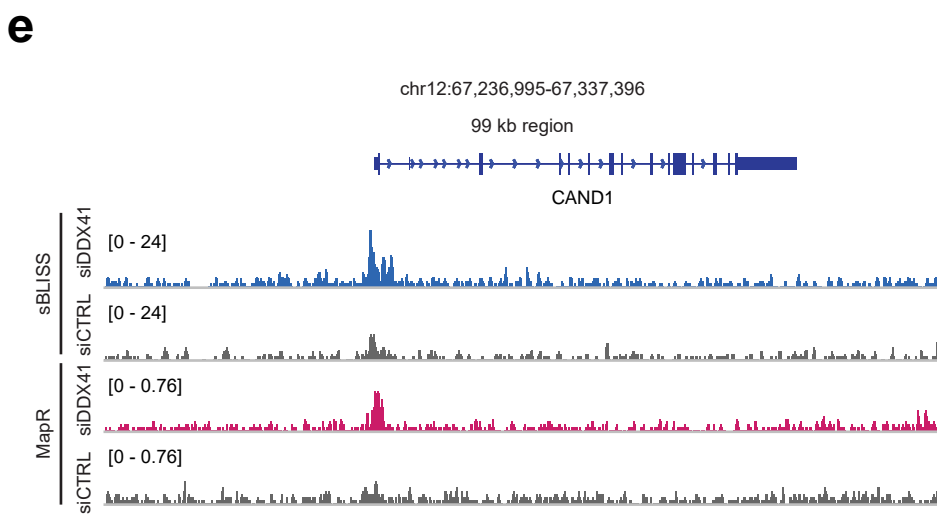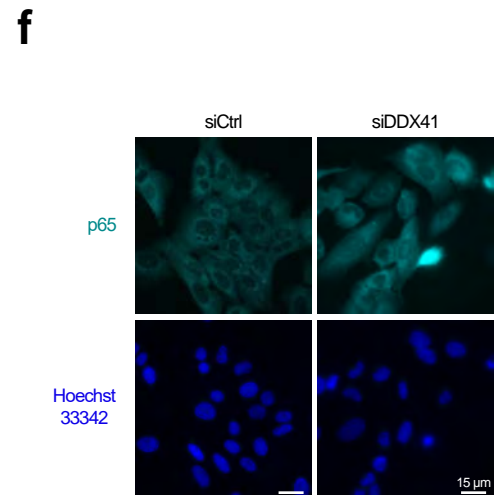

**Supplementary figure 5: Genome-wide analysis of DSBs and R-loops in DDX41 knockdown HCT116 cells**

- a. Scatter plot of  $\log_2$  normalized counts of the peaks detected in control and DDX41 knockdown cells measured by sBLISS in  $n = 2$  biologically independent experiments. Fold change (FC)  $> 2$  was taken to determine genomic regions with DSB gains and DSB loss.
- b. MapR performed in  $n = 3$  biological replicates in HCT116 cells after 48 h knockdown with control siRNA (green) or DDX41 siRNA (red). Metagene profiles of MapR signal ranging from -2kb/+2kb around the transcription start site (TSS) of all expressed genes based on the published GRO-sequencing analysis in HCT116 cells divided in 4 quantiles. Shadows indicate the standard error of the median between replicates.
- c. Heat maps showing the distribution of the MapR signal of all expressed genes for pA-MNase and  $\Delta$ catRNaseH-MNase conditions after 48 h control or DDX41 knockdown. MapR signal was sorted based on gene expression level obtained from the previously published GRO-sequencing analysis from high to low. The region -2kb/+ 2kb around the TSS is individually displayed for each biological replicate. Metagene profiles are outlined above the associated heat maps.
- d. Scatter plot of MapR regions in HCT116 cells. Consensus regions were constructed using the intersection of peaks for the replicates in each condition (siCtrl and siDDX41). The union of these regions was used for further analysis and quantification of the coverage/fold change (FC). The mean  $\log_2$  FC between siCtrl and siDDX41 is plotted against the  $\log_2$  average counts per million representing the coverage. Genomic regions that are differentially regulated (FC $>2$ ) are highlighted in red (up) or in blue (down).
- e. Representative snapshot of a genomic region showing accumulation of R-loops and DSBs profiled by MapR and sBLISS, respectively, in HCT116 cells.
- f. Confocal microscopy of p65 after 48 h control knockdown or DDX41 knockdown in U2OS cells. Representative images of p65 staining (cyan) and DNA counterstaining with DAPI are displayed on the left. Quantification is shown in Figure 5h. Data derived from  $n = 2$  biologically independent experiments. Scale bars represent 15  $\mu$ m.

### List of antibodies used in this study

| Protein name               | Product number/clone | Origin         | Dilution (WB/IF) |
|----------------------------|----------------------|----------------|------------------|
| $\gamma$ H2AX              | A300-081A-M          | Bethyl         | (1:1000/1:500)   |
| 53BP1                      | MAB3802/ BP13        | Millipore      | (-/1:200)        |
| pRPA (S33)                 | A300-246A-M          | Bethyl         | (-/1:200)        |
| DDX41                      | 15076/ D3F1Z         | Cell Signaling | 1:1000           |
| GFP                        | sc-9996/ B-2         | Santa Cruz     | 1:1000           |
| S9.6                       | ENH001/ S9.6         | Kerafast       | 1:10000          |
| dsDNA                      | ab27156/ 35I9 DNA    | Abcam          | 1:1000           |
| AQR                        | A302-547A            | Bethyl         | 1:2000           |
| DDX42                      | SAB1407136           | Sigma          | 1:1000           |
| DDX39A                     | SAB2700315           | Sigma          | 1:1000           |
| FLAG M2                    | F1804/ M2            | Sigma          | 1:2000           |
| B-Actin                    | A2228/ AC-74         | Sigma          | 1:10000          |
| DHX37                      | A300-856A-M          | Bethyl         | 1:1000           |
| BrdU (mouse)               | 347580/ B44          | BD Bioscience  | 1:100            |
| BrdU(rat)                  | ab6326/BU1/75(ICR1)  | Abcam          | 1:500            |
| Anti-mouse Cy3.5           | Ab6946               | Abcam          | 1:100            |
| Anti-rat Cy5               | Ab6565               | Abcam          | 1:100            |
| P65                        | sc-372/ C-20         | Santa Cruz     | (-/1:200)        |
| Phospho-Rpb1-CTD<br>(Ser2) | 13499/ E1Z3G         | Cell signaling | (-/1:200)        |
| Phospho-Rpb1-CTD<br>(Ser5) | 13523/ D9N5I         | Cell signaling | (-/1:200)        |

### List of siRNA used in this study

| Gene name       | Sequence 5'-3' or origin             |
|-----------------|--------------------------------------|
| AQR             | CUGAAUAUGGCGGUGUAGU                  |
| DDX41           | L-010394-00-0005 – Horizon Discovery |
| DDX42           | L-012393-01-0005 – Horizon Discovery |
| DHX37           | L-019073-00-0005– Horizon Discovery  |
| DDX39A          | L-004920-01-0005 – Horizon Discovery |
| DDX27           | L-013635-01-0005 – Horizon Discovery |
| Si control pool | D-001820-10 – Horizon Discovery      |

### List of oligos used in this study

| Construct            | Sequence 5'-3'                                      |
|----------------------|-----------------------------------------------------|
| DDX41-fw-qPCR        | GTCCGTGAAAGAGCAGATGGAG                              |
| DDX41-rev-qPCR       | GTAGCGACAGATGTCTAGGCTG                              |
| HBD-backbone-fw      | cctcctcacggcatagaacatggtggagcctgctttttgtacaaagttgg  |
| HBD-backbone-rev     | cctttgtcaggaaatctgcaagcgaccagctttctgtacaaagt        |
| HBD-insert-fw        | ccaactttgtacaaaaaagcaggctccaccatgttctatgccgtgaggagg |
| HBD-insert rev       | actttgtacaagaaagctgggtcgcttcgagatttctgacaaagg       |
| HBD-W43A-fw          | ctttctgaccgcgaatgagtcgagagcacaggtggaccg             |
| HBD-W43A-rev         | accccggtcttgcggccc                                  |
| HBD-K59A-K60A-fw     | tgccagatttgcggcgttgccacagaggatgagge                 |
| HBD-K59A-K60A-rev    | gcaggaaaccggtccacc                                  |
| DDX41-R525H-fw       | CGCACCGGGCACTCGGGAAAC                               |
| DDX41-R525H_rev      | GCCAATCCGGTGTACATAGTTCTC                            |
| DDX41-L237F-P238T-fw | TGTTACGTTTACCGTCATCATG                              |
| DDX41-L237FP238T-rev | CCAGTGTCTTGCCTGAAC                                  |
| DDX41-3C-rev         | ACCGGGCCCCTGGAACAGAAC                               |
| DDX41-L153-fw        | TTCTGTTCCAGGGGCCCGGTCTGAGCATGTCTGAAGAGC             |
| DDX41-Q410-rev       | gtgctcgagtgcggccgctcactggatgacatccaggctg            |
| DNA-12mer-fw         | GACACCTGATTC-6-FAM                                  |
| DNA-12mer-rev        | GAATCAGGTGTC                                        |
| RNA-12mer-fw         | GACACCTGATTC-6-FAM                                  |
| RNA-12mer-rev        | GAATCAGGTGTC                                        |
| DNA-38mer-IBFQ       | TAAAACAAAACAAAACAAAACAAAATCTTTACGGTGCT-<br>IBFQ     |
| RNA-13mer-6-FAM      | 6-FAM-AGCACCGUAAAGA                                 |
| DNA-38mer            | TAAAACAAAACAAAACAAAACAAAATCTTTACGGTGCT              |
